# Supplementary material for: Trophoblast Major Histocompatibility Complex Class I Expression Is Associated with Immune-Mediated Rejection of Bovine Fetuses Produced by Cloning
Source: PubMed Central journal article supplement — Biol Reprod. 2016 Jul 6;95(2):39. doi: 10.1095/biolreprod.115.136523 (PMC5029473; doi:10.1095/biolreprod.115.136523), 2016-07-06
Supplement: supp_115.136523_biolreprod.115.136523-1.pdf [file supp_115.136523_biolreprod.115.136523-1.pdf]

SUPPLEMENTAL TABLE S1. MHC typing data for cows and embryos.

| Cow #                                                   | Cow MHC Type <sup>a</sup>     | Bull or SCNT line | Embryo MHC Type <sup>a</sup>  |
|---------------------------------------------------------|-------------------------------|-------------------|-------------------------------|
| <b>Control Pregnancies</b>                              |                               |                   |                               |
| B4021                                                   | AH020B-DH1801C/AH075A-DH2601A | AI-038            | AH011A-DH0701A/AH075A-DH2601A |
| B4129                                                   | AH079A-DH1201C/AH106A-DH3601C | AI-038            | AH011A-DH0701A/AH106A-DH3601C |
| B4004                                                   | AH002A-DH0201A/AH078A-DH1801C | AI-064            | AH078A-DH1801C/AH088A-DH1002A |
| B4024                                                   | AH014B-DH3301A/AH093A-DH1601A | AI-064            | AH002A-DH0201A/AH093A-DH1601A |
| B4109                                                   | AH011A-DH1601A/AH012D-DH1501A | AI-064            | AH012D-DH1501A/AH088A-DH1002A |
| B4112 <sup>b</sup>                                      | AH020B-DH1601A/AH104A-DH1101C | AI-064            | AH002A-DH0201A/AH104A-DH1101C |
| B4121                                                   | AH002A-DH0201A/AH107A-DH3202A | AI-064            | AH002A-DH0201A/AH002A-DH0201A |
| B4108                                                   | AH020B-DH1601A/AH104A-DH1501A | AI-141            | AH020B-DH1601A/AH105A-DH1801B |
| <b>MHC-I Homozygous Compatible SCNT Pregnancies</b>     |                               |                   |                               |
| B4425                                                   | AH010A-DH3201A/AH012A-DH1501A | B4150             | AH012A-DH1501A/AH012A-DH1501A |
| B4002                                                   | AH012A-DH0201A/AH????-DH3701A | B4170             | AH012A-DH1501A/AH012A-DH1501A |
| B4139                                                   | AH012A-DH1501A/AH074A-DH0901A | B4170             | AH012A-DH1501A/AH012A-DH1501A |
| B4037                                                   | AH011A-DH0101A/AH100A-DH0201A | B4276             | AH011A-DH0101A/AH011A-DH0101A |
| B4115                                                   | AH011A-DH1101K/AH075B-DH3201A | B4276             | AH011A-DH0101A/AH011A-DH0101A |
| B4428                                                   | AH002A-DH0201A/AH011A-DH0101A | B4276             | AH011A-DH0101A/AH011A-DH0101A |
| B4120 <sup>b</sup>                                      | AH011A-DH0101A/AH087A-DH0301A | B4309             | AH011A-DH0101A/AH011A-DH0101A |
| B4363                                                   | AH011A-DH0101A/AH031A-DH1701A | B4309             | AH011A-DH0101A/AH011A-DH0101A |
| B4423                                                   | AH002A-DH1001A/AH011A-DH0101A | B4309             | AH011A-DH0101A/AH011A-DH0101A |
| <b>MHC-I Homozygous Incompatible SCNT Pregnancies</b>   |                               |                   |                               |
| B4013                                                   | AH073A-DH0101A/AH100A-DH0201A | B4150             | AH012A-DH1501A/AH012A-DH1501A |
| B4020                                                   | AH003A-DH0201A/AH015A-DH1101A | B4150             | AH012A-DH1501A/AH012A-DH1501A |
| B4125 <sup>b</sup>                                      | AH019B-DH0701A/AH077A-DH2707B | B4150             | AH012A-DH1501A/AH012A-DH1501A |
| B4022                                                   | AH003A-DH0201A/AH088A-DH1002A | B4170             | AH012A-DH1501A/AH012A-DH1501A |
| B4029                                                   | AH002A-DH0201A/AH011A-DH0101A | B4170             | AH012A-DH1501A/AH012A-DH1501A |
| B3992                                                   | AH020B-DH3202A/AH063B-DH3201A | B4309             | AH011A-DH0101A/AH011A-DH0101A |
| B4010                                                   | AH002A-DH0201A/AH020B-DH1601A | B4309             | AH011A-DH0101A/AH011A-DH0101A |
| B4119                                                   | AH075A-DH2601A/AH104A-DH1501A | B4309             | AH011A-DH0101A/AH011A-DH0101A |
| <b>MHC-I Heterozygous Incompatible SCNT Pregnancies</b> |                               |                   |                               |
| B3986 <sup>b</sup>                                      | AH012A-DH0201A/AH075A-DH3201A | B4164             | AH019B-DH1001A/AH110A-DH2001A |
| B3989 <sup>b</sup>                                      | AH019A-DH0801A/AH074A-DH3601A | B4164             | AH019B-DH1001A/AH110A-DH2001A |
| B3997 <sup>b</sup>                                      | AH089A-DH3201A/AH103A-DH1201A | B4164             | AH019B-DH1001A/AH110A-DH2001A |
| B4027 <sup>b</sup>                                      | AH002A-DH0201A/AH020B-DH1801C | B4164             | AH019B-DH1001A/AH110A-DH2001A |
| B4033 <sup>b</sup>                                      | AH015A-DH1101A/AH065A-DH1801A | B4164             | AH019B-DH1001A/AH110A-DH2001A |

<sup>a</sup>Each MHC haplotype carried by an animal is comprised of a MHC-I haplotype (AH) and a MHC-II haplotype (DH). The nomenclature is similar to that used in previous publications [14].

<sup>b</sup>Embryo was dead at time of sample collection.

RUTIGLIANO ET AL., SUPPLEMENTAL FIGURES

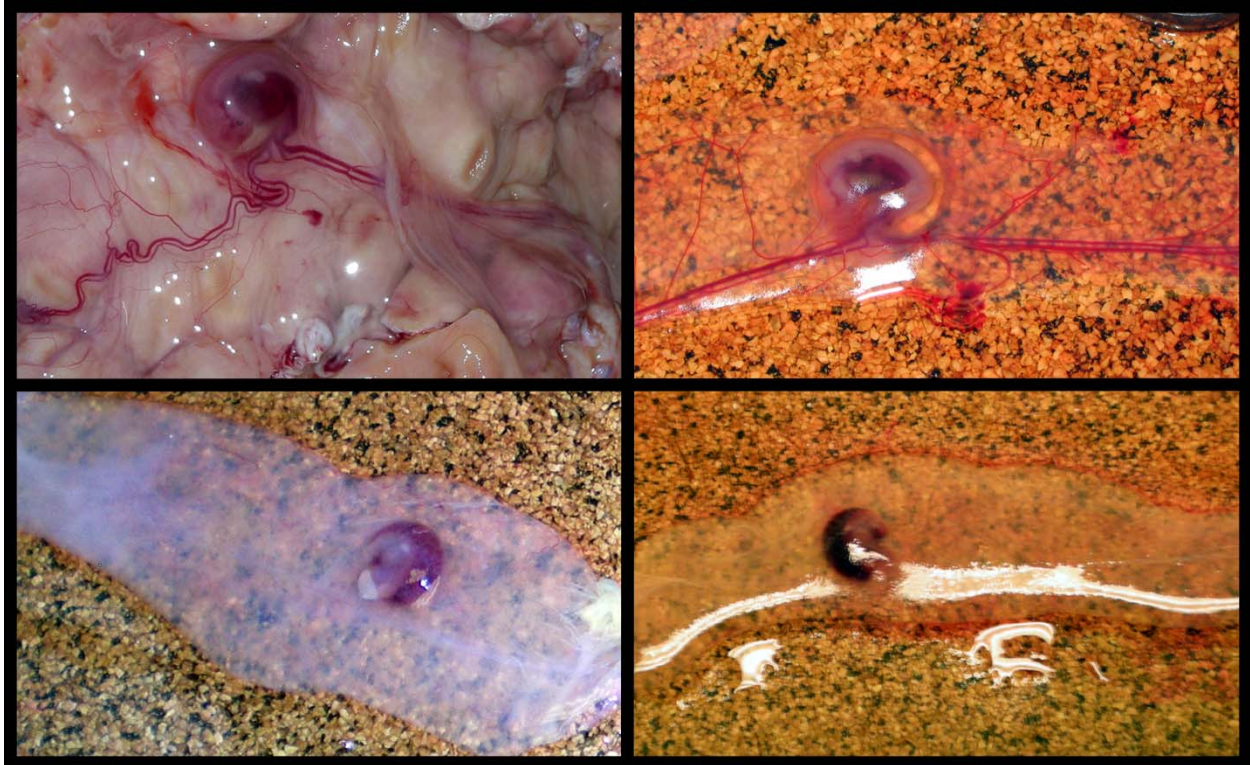

SUPPLEMENTAL FIG. S1. Viable and non-viable Day 34 or 35 conceptuses. The upper two pictures are of healthy AI control conceptus and the bottom two pictures are of non-viable MHC-I heterozygous incompatible conceptuses. All viable conceptuses had blood filled placental vasculature that was readily visualized. The non-viable conceptuses were hemorrhagic and had placental vaculature that was hard to identify grossly because of the lack of circulating red blood cells.

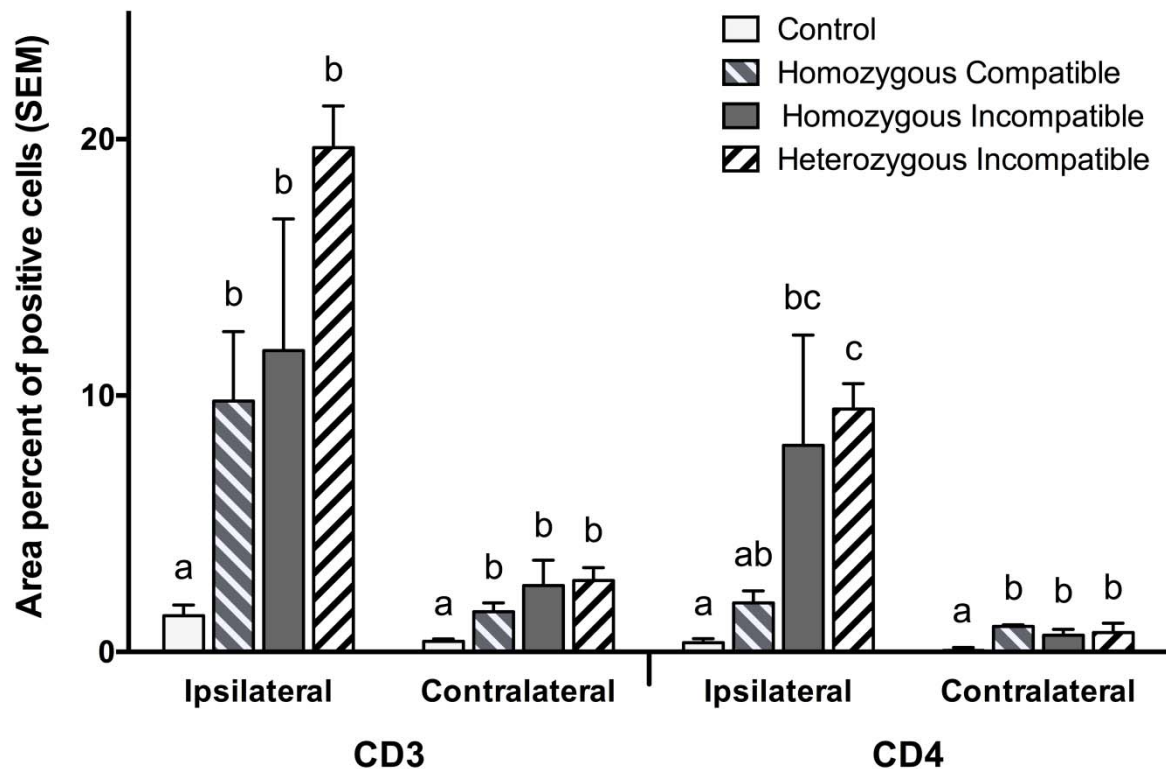

SUPPLEMENTAL FIG. S2. Percent area of dispersed CD3<sup>+</sup> and CD4<sup>+</sup> T cells in the ipsilateral and contralateral endometrium of control (n=8), MHC-I homozygous compatible SCNT (n=9), MHC-I homozygous incompatible SCNT (n=8) and MHC-I heterozygous incompatible SCNT (n=5) pregnancies at day 35 ±1 of pregnancy. Age matched control pregnancies were established by AI. Groups with different superscripts were significantly different ( $P < 0.05$ ).
